# Supplementary material for: The European summer heatwave 2019 – a regional storyline perspective
Source: Copernicus journal article supplement (doi:10.5194/esd-2024-16), 2024-07-15
Supplement: Supplementary file [file esd-2024-16-AC2-supplement.pdf]

We thank Referee #2 for his/her valuable comments and suggestions, which helped to improve the manuscript and to remove ambiguities/misunderstandings. Below are point-to-point responses to each comment.

Journal: Earth System Dynamics, discussion paper esd-2024-16

Review, 27 August 2024

Title: "The European summer heatwave 2019 – a regional storyline perspective"

Authors: Tatiana Klimiuk, Patrick Ludwig, Antonio Sanchez-Benitez, Helge F.

Goessling, Peter Braesicke, and Joaquim G. Pinto

Recommendation: [Major/Minor Revision]

#### GENERAL COMMENTS:

This article presents a storyline approach of the unfolding of European summer of 2019 on a regional scale with special focus on the heat wave end of July 2019. Next to assessing the outcomes for present-day conditions, corresponding to +1.4K global warming, the methodology is repeated to cooler pre-industrial conditions, and to warmer future climates projected at several levels of future global warming. Storylines are constructed from a GCM-RCM-CPM model chain where the GCM is spectrally nudged to ERA5 vorticity and divergence to enforce the GCM atmospheric circulation to stay close to observed circulation patterns. GCM states are subsequently used for downscaling at 12 km for the European domain and 3 km for a Central-European region encompassing Germany. A performance assessment of the present-day climate simulation indicates an improvement of representing 2-meter temperature by the RCM and even more so by the CPM compared to the GCM. A primary finding of the storyline approach is a doubling, and at some locations, almost a tripling of local warming rates relative to the background warming during the episode prior and during the heat wave whereas earlier in the season (late spring/early summer) this ratio tend to be much smaller.

The storyline perspective built from constraining the climate model state through spectral nudging to a quasi-observed state (followed by standard dynamical downscaling) provides an elegant method to isolate the thermodynamic response to anthropogenically induced climate change from the circulation response. That part of the work is already developed and described in the paper by Sanchez-Benitez et al. (2022).

The present article focuses on the subsequent downscaling steps and potential impact on a regional to local scale. Overall it is well written and of general interest, however a number of issues require attention before the manuscript is suitable for publication.

We thank Referee #2 for the critical and detailed assessment of our manuscript.

#### MAJOR POINTS:

1. What I found quite surprising to notice is that the authors seem not aware, at least nowhere in the manuscript any reference is made, of a widely used alternative approach, commonly referred to as Pseudo Global Warming (PGW), in which following a comparable methodology storylines are built from primarily the thermodynamic (or physical) responses to projected future global warming.

Examples in literature include for example:

- Schär et al., 1996 Surrogate climate-change scenarios for regional climate models

Geophys. Res.

Lett. 23 669–72

- Prein et al., 2017.: The future intensification of hourly precipitation extremes, Nat. Clim. Change, 7, 48–52, <https://doi.org/10.1038/nclimate3168>
- Aalbers et al., 2023 The 2018 West-Central European drought projected in a warmer climate: how much drier can it get? Nat. Hazards Earth Syst. Sci. 23 1921–46 <https://doi.org/10.5194/nhess-23-1921-2023>
- Brogli et al., 2023 The pseudo-global-warming (PGW) approach: methodology, software package PGW4ERA5 v1.1, validation and sensitivity analyses Geosci. Model Dev. 16 907–26 <https://doi.org/10.5194/gmd-16-907-2023>

Moreover, just two weeks after this manuscript was submitted a paper by H. de Vries et al., entitled “Western Europe’s extreme July 2019 heatwave in a warmer world”, appeared in Environmental Research: Climate ( <https://doi.org/10.1088/2752-5295/ad519f> ) in which the authors develop a storyline perspective built on the PGW approach focusing on the very same event.

In my opinion, reference to the PGW-approach in the context of the application presented in this paper is required, and I would strongly encourage to include a discussion on the pro’s and cons of applying the respective methods (spectral nudging and PGW) in this type of storyline development, focusing on events or episodes.

Reply: We agree that we have not discussed this approach in the previous version of this manuscript, and this will be changed in the new version of the paper. We are very aware of the PGW approach, and indeed, we have used it in other studies (e.g. Ludwig et al. 2023 focusing on the Central European floods 2021, <https://doi.org/10.5194/nhess-23-1287-2023>).

After a brief introduction to both approaches, we will mention that the usage of a nudged global climate model was motivated by the absence of a need to make any assumptions on the delta fields, creating physically consistent dynamical and thermodynamical conditions that would correspond to the synoptic evolution of that particular event, including the SSTs, as the AWI-CM1 is a coupled climate model. On the contrary, the PGW approach does not account for the interannual variability of those fields (Brogli et al., 2023).

On the other hand, one of the advantages of the PGW approach over ours is the potential to avoid GCM-specific biases by repeating the experiment with deltas derived from various models or model means. In our work, we follow the path prescribed by a single GCM. In the context of the storyline approach, this unfolding of events is physically self-consistent and plausible, which complies with the definition of a storyline introduced by Shepherd (2018) and allows for a process-oriented evaluation of the obtained responses. This text will be expanded and included in the manuscript. We will, of course, also cite de Vries et al., 2024, which we were not aware of.

2. It is unfortunate that the region with highest temperatures during the heat wave episode is on the western edge of the ICON-GER-3 domain (see Figure 6). In particular, it makes the conclusion that the region of highest relative warming rates shifts to the east questionable. Comparing both panels from Fig. 9b it appears to me that because the region with highest warming rates in the GER-3 simulations is so near to the western edge of the CPM modelling domain, and according to the EUR-12 simulations this region is actually extending further west, the claim that the area with highest warming rates shifts to the east can, instead

of being a genuine outcome, simply be an artefact induced by the proximity of the lateral boundary zone.

Reply: We agree that the GER-3 domain does not cover central parts of France, where the peak temperatures occurred. This is due to the specificity of the Innopool SCENIC project, which focuses on extreme events in Germany and associated impacts.

As you mentioned, there is almost no shift of the heatwave's core: in Figure 6i (+4K), we see that the 45°C contour occupies a similar region occupied by the 42°C contour in Figure 6c (present-day). However, with our analysis, we want to convey that the areas with the highest warming rates are found outside the heatwave's core region in both EUR-12 and GER-3 simulations. This can be illustrated by Figure S5 of our supplementary material and with an additional Figure R1, presented below, which shows specifically the warming rates. In Figures S5 and R1, the core of the heatwave is outlined by contour lines, and the temperature difference of the +4K simulation to the present day is shown by shading. Both EUR-12 and GER-3 (see Figure S5) simulations show that the maximum temperature delta is outside of the 42°C contour. But indeed, the warming rates within the heatwave's core are still high (see Figure R1).

Thus, we would like to keep the simulation domains as they are because, with our experiment setup, the largest warming rates are captured within the domain. However, we understand the reviewer's concern. Therefore, we have added a statement that different choices could have been made if the focus of the project had been different. We also plan to add Figure R1 to the supplementary material.

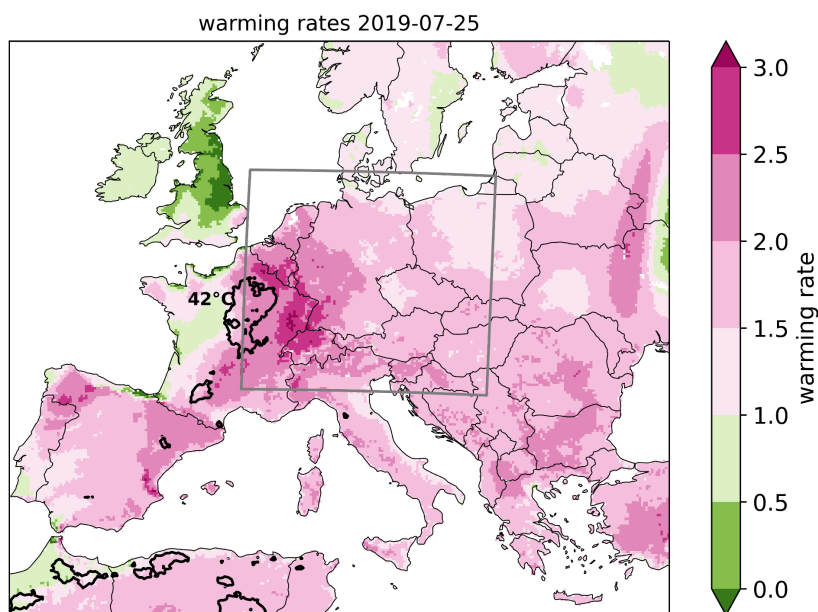

**Figure R1.** Ensemble mean of warming rates for the 25th of July 2019. The black contour delineates the 42°C threshold; the grey box indicates the boundaries of the GER-3 domain.

Additionally, a further complication is that the role of internal variability can not be assessed here, because the authors have limited their downscaling experiments to one member based on the presumption that the ensemble spread in the GCM-experiments appeared is small enough during the heat wave episode. But without testing it is hard to make it plausible that this is a justifiable assumption.

Reply: We acknowledge the importance of utilising all five available AWI-CM1 ensemble members to enhance the robustness of our results. At the time of manuscript preparation, we were technically limited to processing only ensemble member 1. With the entire ensemble now available for the EUR-12 domain, we will incorporate the uncertainty ranges into Figures 3, 7, and 8 (see an example of changed Figures 7a and 8d in Figures R2 and R3 below). Additionally, we will provide the ensemble range of the focus period of the 23-27th of July and the 25th of July in the supplementary materials. We would like to keep the 2d plots as they are to be consistent with the GER-3 simulation, which is based on the ensemble member 1.

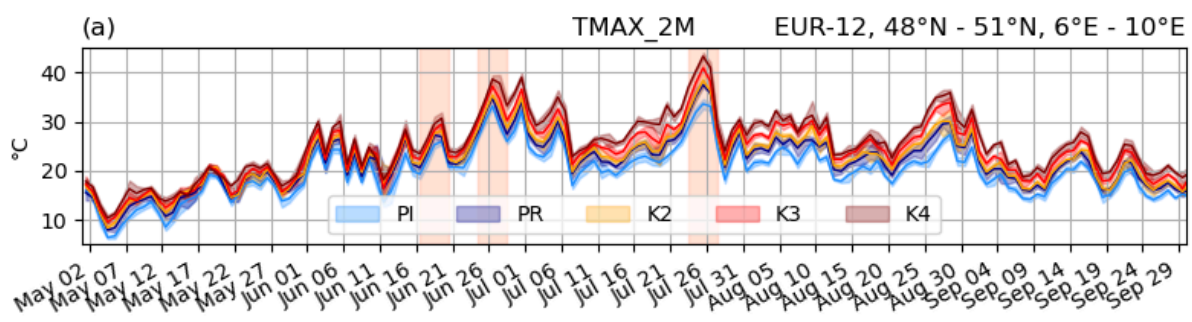

**Figure R2.** Daily maximum temperatures averaged over the longitude/latitude box with boundaries 48° N 51° N and 6° E - 10° E (see Fig. 1b) over the MJJAS period of the year 2019 based on the EUR-12 storyline simulations. Shading spans the minimum/maximum range of values obtained from the five-member ensembles.

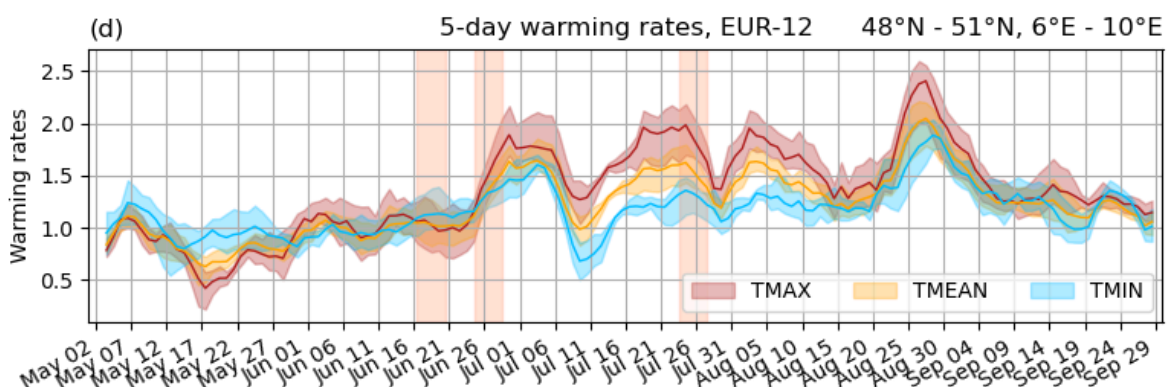

**Figure R3.** Ensemble mean of warming rates for the running mean (5-day window) of daily maximum, mean, and minimum temperatures over the same box as in Figure R2. Shading spans the minimum/maximum range of values obtained from the five-member ensembles.

For the authors interest, the results from de Vries et al. (2024) do not indicate an eastward shift of the area with highest warming rates relative to the area with highest temperatures in the present-day simulation (their Figs 8 and S6).

Reply: We thank the Reviewer for suggesting that such a discussion be added to the paper, as this addition would strengthen the manuscript and allow a more comprehensive view of the topic. We have carefully read the work by de Vries et al. (2024) and found that the warming rates in Central France shown in their Figure S6 are similar to ours and range from 1.5 to 2.5 °C/K (see Figure R1). Indeed, the areas with warming rates exceeding 2.5 °C/K are different from de Vries et al. (2024), but in both studies, they are outside of the core region of the French heatwave. So, we do not think that their results and ours contradict each other, even though the approaches are quite different. Thus, we argue that both studies provide a different perspective on how the 2019 heat wave would develop in a warmer world. We will add the above-mentioned points and other points to the discussion part of our manuscript.

#### OTHER POINTS:

1. Line 87,146,156: Replace the word “validation” by “evaluation”. A model result cannot be validated.

Reply: Thanks, this will be implemented

2. Section 2.1: I found the description somewhat confusing as if the spectral nudging is a feature of the AWI-CM1 GCM. I think though it should be considered an extension to enforce simulations in free climate mode to be constrained by ERA5-reanalyses. I suggest to remove the two words “spectral nudged” from line 92, and rephrase line 100 as “In the storyline experiments the evolution of the AWI-CM1 large-scale atmospheric circulation is constrained by spectrally nudging the model vorticity and divergence ...”

Reply: We agree with rephrasing the line 100 in a suggested way. We will also consider removing “spectral nudged” from line 92.

3. Line 64: “at resolutions of less than 4 km” → “at resolutions finer than 4 km”

4. Line 120: “the spread” → “the inter-member spread”

5. Line 122-123: Please explain the meaning of R12B5 and R13B7 resolution,

Reply: Thanks, all of the above will be implemented

6. Figure 1: Are the shown EUR-12 and GER-3 domains, the respective modelling domains including or excluding the lateral boundary zone? Please mention in the caption

Reply: The domains shown in Figure 1 include the lateral boundary zone. We will mention it in the caption.

7. Line 138: What does “vn” stand for?

Reply: Thank you for pointing this out.  $v_n$  is not used in any equation. Thus, we will omit this in line 138. But generally,  $v_n$  stands for the velocity normal to the edge of the triangular grid cell.

8. Line 141-145: It is unclear how the soil information from ERA5 is used to adjust the forcing in the respective storyline, specifically at which stage of the model chain does it enter the computations.

Reply: Sorry for this inconsistency. We will mention in the text that the soil temperature and soil moisture from ERA5 were used to initialise the EUR-12 simulations due to the partial unavailability of soil temperature in AWI-CM1 outputs. To let the soil adapt to different climate conditions, we used a longer spin-up time for storylines, as described in L142-143.

9. Also the way the 4-layer temperature and soil moisture from ERA5 is mapped onto the soil mesh of either of the three models (AWI-CM1 and/or ICON-EUR-12 and/or ICON-GER-3) is unclear, in particular for soil moisture this is not a trivial mapping given the role of soil type in the ERA5 hydrological module HTESSEL. Please, Clarify.

Reply: The soil temperature and moisture entering ICON in their original form are being pre-processed by the built-in algorithm. To account for the possible discrepancy of soil types in ICON and ERA5, the volumetric soil moisture is transformed into the universal soil moisture index (SMI), which takes into account different soil types (see e.g.. Prill et al. 2023, DOI: 10.5676/DWD\_pub/nwv/icon\_tutorial2023).

10. The remark “the temperature of the lowermost soil level ( $T_{CL}$ ) was adjusted” sounds worrying in this context, why adapting a climate related prognostic variable, the simulation itself should keep track of an appropriate evolution.

Reply: We agree that this sentence looks misleading. This is a technical detail of the soil layer treatment in the model. In ICON, the lowermost soil moisture level is not prognostic but serves as a lower boundary condition for the heat conduction equation (Schulz et al., 2016, DOI: [10.1127/metz/2016/0537](https://doi.org/10.1127/metz/2016/0537)). It is, by default, set to the climatological annual mean near-surface temperature  $T_{CL}$  based on the Climate Research Unit data (Mitchel and Jones, 2005, <https://doi.org/10.1002/joc.1181>). We adjusted this lower boundary condition by adding (or subtracting, in case of pre-industrial climate) 1°C to it for each corresponding storyline.

11. Line 157: “model’s output” → “model output” (and everywhere else)

Reply: Thanks, this will be implemented

12. Line 187-188: “However, as our study is focused on Central Europe, the model performance in the most western and eastern part of the domain is found to be acceptable” . According to Fig 4 and Fig S3, there is a considerable cold bias in ICON-EUR-12 maximum 2-m temperature compared to EOBS-12 with hatched areas in most of Germany, the eastern part of France, and Sweden/Norway. On the one hand, why do the authors consider the size of the bias acceptable, given the



purpose of the paper, on the other hand what is the relevance of this bias, given that they are primarily interested in the heat wave response under different storylines.

Reply: Thank you for pointing this out. Essentially, the information about the bias is there only to illustrate that the underestimation of daily maximum temperature found in AWI-CM1 output was reduced over Central Europe by dynamical downscaling. We admit that the fact that most of Central Europe is hatched in Fig. 4c puts into question the relevance of this information for the study. Moreover, the time series in Fig. 3a, as well as the delta-RMSD maps in Fig. 4b show a clear improvement in TMAX representation with dynamical downscaling. We are considering removing the right columns (bias maps) from Fig. 4 and 5 and moving them to the supplementary material, adding the bias maps of the driving AWI-CM1 simulation and control run. Additionally, the direct comparison of seasonally averaged temperature fields is already given in Fig. S2 of the supplementary. In Figure R4 below, one can see the reduction in bias in central Europe.

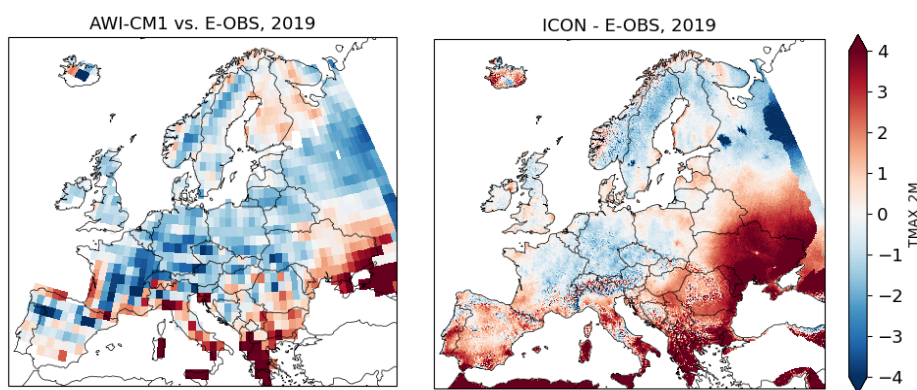

**Figure R4.** seasonal mean bias of daily maximum temperature with respect to E-OBS; left: AWI-CM1, right: ICON-EUR-12

13. Line 189: “indicating “ is too strong phrasing, use “suggesting”.

Reply: Thanks, this will be implemented

14. Figure 4: The authors might check what part of the temperature biases (right column) in ICON-EUR-12 originates from the AWI-CM1 driving fields by carrying out the RCM simulation directly driven by ERA5. Has such a simulation been conducted?

Reply: Thank you for this comment. We conducted the control simulation directly driven by ERA5 but did not include it in the manuscript. The control run bias maps for daily maximum, mean, and minimum temperatures over the JJA period are shown in Figure R5. As the patterns in Figures R5 (left) and R4 (right) are similar, we assume that the bias of AWI-CM1 did not propagate strongly into the regional simulations. We will add to the manuscript the part on the contribution of AWI-CM1 driving fields and ICON-EUR-12 downscaling into the summer temperature biases.

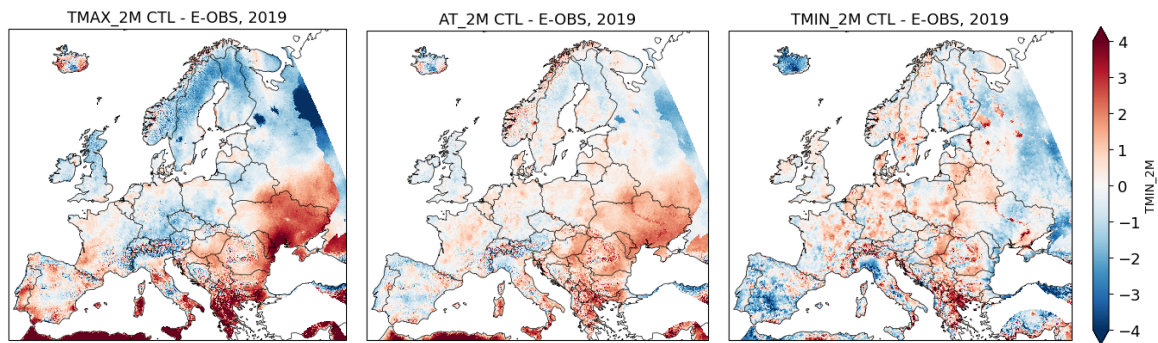

**Figure R5.** seasonal mean bias of daily maximum (left), mean (middle), and minimum (right) temperature with respect to E-OBS;

15. Lines 197-200: I recommend to omit statements like “indicating a further added value of our approach”, since “added value” of high-resolution computations wrt coarser resolution has a somewhat different framing than in the context of evaluation. Also, in my perception the result from ICON-GER-3 wrt ICON-EUR-12 yields only an improvement for maximum 2-m temperature, and not for mean and 2-meter minimum Temperature.

Reply: we will remove this part

16. Line 201: “improved topography” → “refined topography”

17. Figure 6: Please use a different colour indicating the 40C line, e.g. green or black.

Reply: Thanks, this will be implemented

18. Line 242: What is meant by “individual”?

Reply: We agree that the word “individual” is misleading. We meant TMAX, TMIN, and TMEAN. It will be changed in the revised manuscript.

19. Line 248: “... which occurs in late August when the temperature again increase during summer.” Why is this happening? Please, expand on the possible mechanism behind this behaviour.

Reply: Thank you for the comment. We admit that no discussion of the last warming rate peak has been provided. We plan to comment on the tendency of warming rates to increase towards late summer, which presumably happens due to the decrease in soil moisture. The high warming rates of the late August heat wave might be explained by this intraseasonal dependency (see, e.g. Hundhausen et al. (2023)).

20. Line 255: “in spring and early summer.” And also in September?

Reply: Thank you. We will also comment on the alignment of TMIN and TMAX warming rates by the end of the hot season.

21. Line 260: refer to “goodness of fit” instead of R2

Reply: Thanks, this will be implemented



22. Line 268: “in line with the finding” Presumably, this is just an expression of the same finding, not an independent confirmation of it.

Reply: We agree with the comment. This expression will be replaced by “underscoring”

23. Line 271-273: Likely also because the British Isles are surrounded by sea.

Reply: Thank you. We will revise and extend this sentence.

24. Line 299: “to the west of it”. Presumably, “to the east of it” is what is meant.

Reply: indeed, we will change this.

25. Line 309: avoid using “observed”, but use “derived warming rate” instead

Reply: Thanks, this will be implemented

26. Line 310: “temporal”? The authors refer to intra-seasonal variations?

Reply: yes, one can also call them intra-seasonal.

27. Line 315: “extending” → “an extension of” (or “an increase of”)

Reply: Thanks, this will be implemented

28. Lines 328-329: this statement is very speculative.

Reply: The sentence will be changed as follows:

The high but limited (<2.5 on the 25th of July) warming rates at the centre of the July 2019 heatwave may be explained by the possible decrease in the strength of soil moisture-temperature coupling over desiccated soils (e.g., Gevaert et al., 2018)

29. Line 336: “ ... we addressed here for the first time ...” I am afraid this statement no longer holds, see de Vries et al. (2024) for an analysis of the heat wave of 2019, and Aalbers et al. (2023) for a comparable type of analysis of the drought episodes and heat wave of 2018.

Reply: We agree that the temporal evolution of a heat wave in several alternative climates on a regional scale has been investigated in the mentioned works. We will reformulate this sentence, emphasising that the specificity of our approach is in the downscaling of global nudged storylines obtained with the coupled climate model.
